# Supplementary material
Source: PubMed Central journal article supplement (PMC3993934)
Supplement: bc4005975_si_001.pdf [file bc4005975_si_001.pdf]

SUPPORTING INFORMATION FOR MANUSCRIPT TITLED  
**“Chemoenzymatic Synthesis of Oligohyaluronan-Lipid Conjugates”**

Dipali Ruhela, Saul Kivimäe and Francis C. Szoka, Jr.\*

Departments of Bioengineering, Therapeutic Sciences and Pharmaceutical Chemistry, University of California San Francisco, 513 Parnassus Ave, San Francisco, CA 94143-0912

**Table of contents**

**FIGURE S1:** MALDI-TOF (negative mode) profile of HA-DiPhPE digested over different time intervals with hyaluronidase

**FIGURE S2:** MALDI-TOF (negative mode) analysis of aqueous layer obtained after Phospholipase digestion of HA<sub>n</sub>-DiPhPE

**Figure S1.** MALDI-TOF (negative mode) profile of HA-DiPhPE digested over different time intervals with hyaluronidase

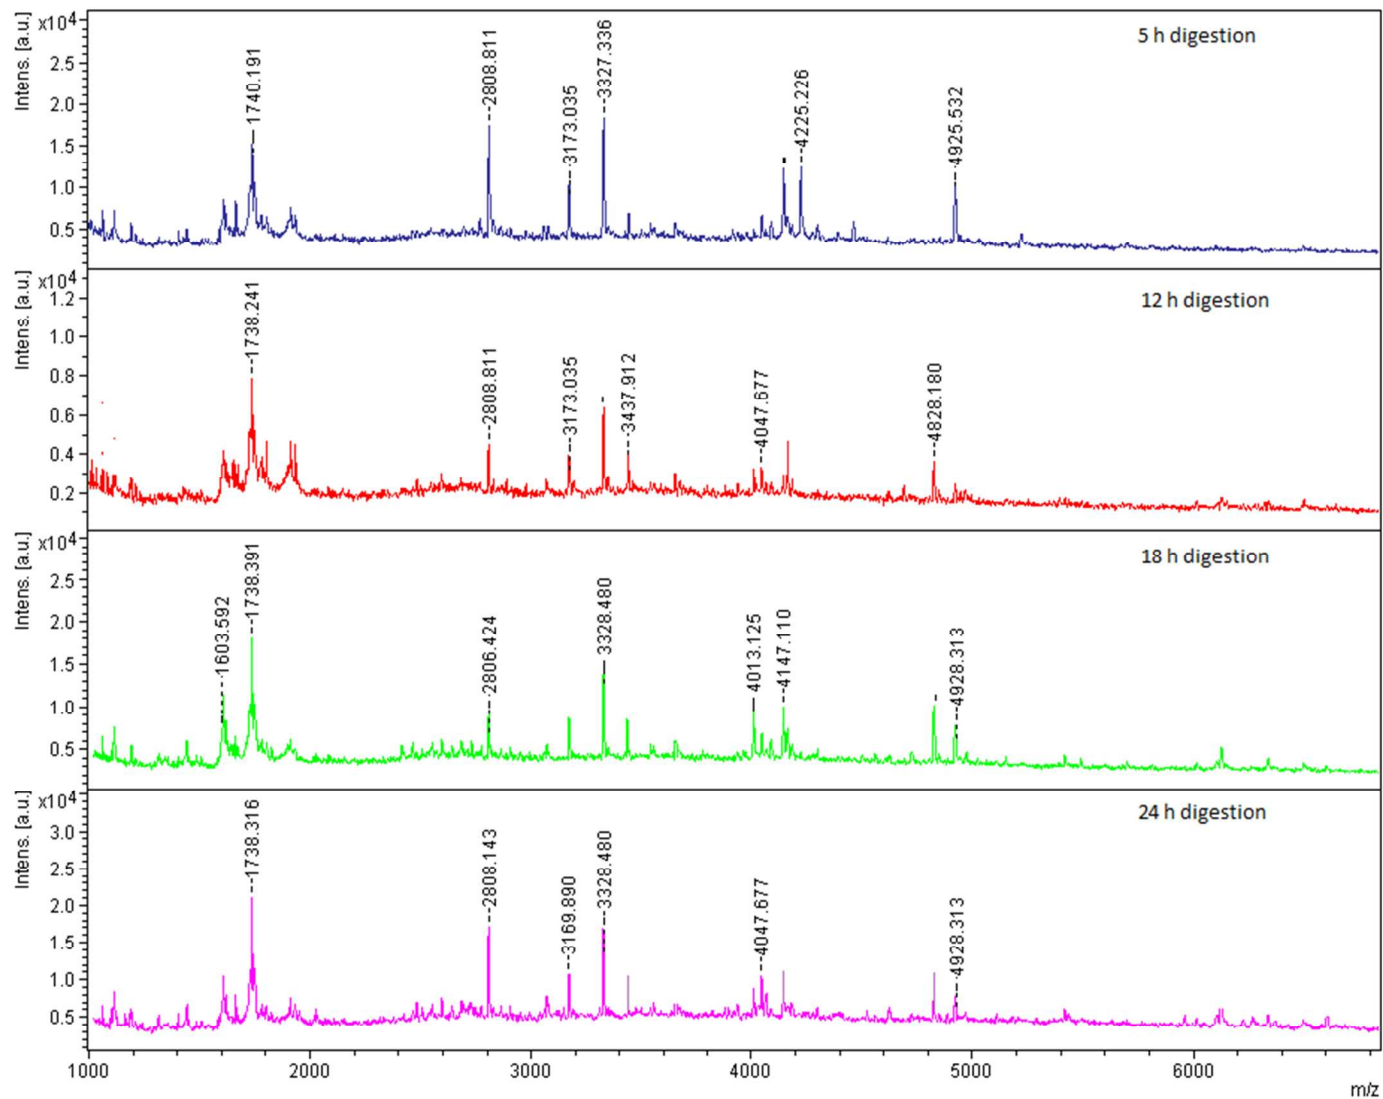

**Figure S2.** MALDI-TOF (negative mode) analysis of aqueous layer obtained after Phospholipase digestion of HA<sub>n</sub>-DiPhPE

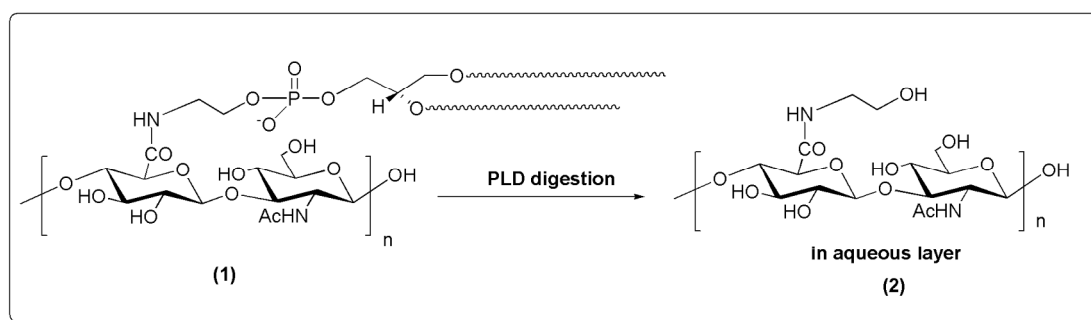

| Parent HA <sub>n</sub> -DiPhPE (1)      | Observed MW of HA (2) | Expected MW of HA (2)     |
|-----------------------------------------|-----------------------|---------------------------|
| HA <sub>10</sub> -DiPhPE                | 1938                  | 1939 (M-H <sub>2</sub> O) |
| HA <sub>10</sub> -DiPhPE                | 1957                  | 1957 (M)                  |
| HA <sub>10</sub> -(DiPhPE) <sub>2</sub> | 1981                  | 1982 (M-H <sub>2</sub> O) |
| HA <sub>12</sub> -DiPhPE                | 2321                  | 2318 (M-H <sub>2</sub> O) |
| HA <sub>12</sub> -DiPhPE                | 2338                  | 2336 (M)                  |
| HA <sub>12</sub> -(DiPhPE) <sub>2</sub> | 2360                  | 2361 (M)                  |
| HA <sub>14</sub> -DiPhPE                | 2703                  | 2698 (M-H <sub>2</sub> O) |
| HA <sub>14</sub> -(DiPhPE) <sub>2</sub> | 2741                  | 2741 (M-H <sub>2</sub> O) |
| HA <sub>16</sub> -DiPhPE                | 3092                  | 3095 (M)                  |

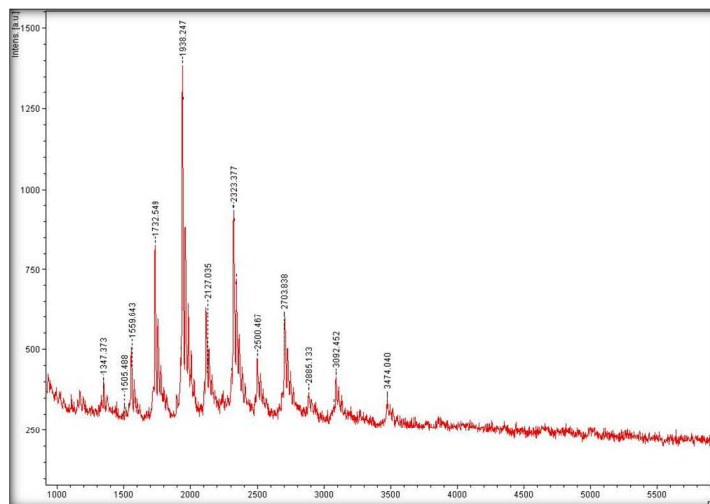

**Representative MALDI profile**
